# Supplementary material
Source: HighWire-hosted journal article supplement (https://bmjopen.bmj.com/content/13/2/e070640)
Supplement: inline-supplementary-material-2 [file inline-supplementary-material-2.pdf]

## Supplementary file 2. Studies excluded

List of 32 studies identified through electronic search and excluded after full-text reading

| Study reference                                                                                                                                                                                                                                                                                                  | Reason for exclusion                                                     | Category for exclusion |
|------------------------------------------------------------------------------------------------------------------------------------------------------------------------------------------------------------------------------------------------------------------------------------------------------------------|--------------------------------------------------------------------------|------------------------|
| Becker, D. A.; Blanchard, C. T.; Szychowski, J. M.; Rogers, S. L.; Brumfield, C. G.; Subramaniam, A. 743: The effect of an operative vaginal delivery curriculum for OBGYN residents American Journal of Obstetrics and Gynecology 2019;220(1):S488                                                              | Conference abstract of study later published and included (Becker 2020)  | Abstract               |
| Beneru, D.; Mcgee, T.; Jenkins, G. Caesarean sections at full dilatation before and after mandatory consultant presence. Australian and New Zealand Journal of Obstetrics and Gynaecology 2021;61(SUPPL 1):6                                                                                                     | Conference abstract only                                                 | Abstract               |
| Caughey, A.; Cheng, Y. W.; Zlatnik, M.; Nguy, M.; Nguyen, L.; Thiet, M. P. Perineal lacerations and operative vaginal delivery: Results from a quality improvement program American Journal of Obstetrics and Gynecology Dec 2007;197(6):S79-S79                                                                 | Conference abstract only                                                 | Abstract               |
| Coleman, L.; Basude, S. A simple program of focused education and simulation training to reduce the rate of obstetric anal sphincter injury at forceps delivery. BJOG. Apr 2015;122():78-78                                                                                                                      | Conference abstract only                                                 | Abstract               |
| Fox, Nathan S.; Bardos, Jonah; Loudon, Holly; Rekawek, Patricia; Friedman, Frederick; Brodman, Michael. 523: Adding senior obstetrician supervision increases the forceps delivery rate and decreases the cesarean delivery rate for residents. American Journal of Obstetrics and Gynecology 2017; 216(1S):S309 | Conference abstract only                                                 | Abstract               |
| Halawani, M.; Webster, S.; Soliman, E.; El-Nouri, A. Reintroduction of operative vaginal delivery at a large tertiary referral hospital in Cairo, Egypt. International Journal of Gynecology and Obstetrics 2018;143:279                                                                                         | Conference abstract only                                                 | Abstract               |
| Hodges, R.; Skinner, S.; Wallace, E.; Davies, M. Perinatal and maternal outcomes after training obstetric residents in forceps before vacuum operative birth. American Journal of Obstetrics and Gynecology 2016;214(1):S270-S271                                                                                | Conference abstract of study later published and included (Skinner 2017) | Abstract               |
| Jovic, E.; Sethna, F. Does consultant attendance for a second-stage delivery in theatre make a difference? Australian and New Zealand Journal of Obstetrics and Gynaecology 2021;61(SUPPL 1):71-72                                                                                                               | Conference abstract only                                                 | Abstract               |
| Muller, B.; Gilreath, N.; Wineland, R.; Sullivan, S.; Finneran, M.M. Impact of contemporary labor curves on primary cesarean delivery at a single institution American Journal of Obstetrics and Gynecology 2021;224(2):S386                                                                                     | Conference abstract only                                                 | Abstract               |
| Negi, Masaru MD; Espinal, Mariana MD; Holveck, Beth RN; Mehlhaff, Krista MD; Cron, Julia MD; Pettker, Christian Michael MD Improvement of Operative Vaginal Delivery Training in Residency: A Single Institution Experience [17G], Obstetrics & Gynecology: May 2020 - Volume 135 - Issue - p 75S                | Conference abstract only                                                 | Abstract               |
| Russell, M.; Esen, U. Achieving safety and success of operative vaginal deliveries at a district teaching hospital - A triumph of audit and a targeted practical teaching workshop. International Journal of Gynecology and Obstetrics 2009;107(S2):S548                                                         | Conference abstract only                                                 | Abstract               |

|                                                                                                                                                                                                                                                                                                                                                     |                                                 |                    |
|-----------------------------------------------------------------------------------------------------------------------------------------------------------------------------------------------------------------------------------------------------------------------------------------------------------------------------------------------------|-------------------------------------------------|--------------------|
| Stephens-Hennessy, Beth M. Implementation of the California Maternal Quality Care Collaborative Toolkit to Support Vaginal Birth and Reduce Primary Cesarean Births JOGNN: Journal of Obstetric, Gynecologic & Neonatal Nursing 2018;47(3):S51-S52                                                                                                  | Conference abstract only                        | Abstract           |
| Wilkinson, M; Mumtaz, H; Nassar, M; Gopal, G. Does consultant presence at trials of operative vaginal delivery increase success? BJOG- 2021;128(S2):152                                                                                                                                                                                             | Conference abstract only                        | Abstract           |
| Zaid, R. Z.; Yoong, W.; Lhodi, W.; Hirsch, M.; Anderson, K.; Balghari, Z.; Aziz, A.; Relph, S.; Sivashanmugarajan, V.; Govind, A. Delivering a modular, concise training package for instrumental vaginal deliveries. BJOG 2013;120(S2):594                                                                                                         | Conference abstract only                        | Abstract           |
| Dietz, Hans Peter; Ka Lai, Shek; Callaghan, Sascha; Shek, Ka Lai. Perinatal and Maternal Outcomes After Training Residents in Forceps Before Vacuum Instrumental Birth. Obstetrics & Gynecology 2017;130(4):910-910                                                                                                                                 | Letter commenting study by Skinner 2017         | Letter             |
| Spencer, C.; Murphy, D.; Bewley, S. Caesarean delivery in the second stage of labour: better training in instrumental delivery may reduce rates. BMJ 2006;333(7569):613-614                                                                                                                                                                         | Letter                                          | Letter             |
| van Tetering AAC, van Meurs A, Ntuyo P, van der Hout-van der Jagt MB, Mulders LGM, Nolens B, Namagambe I, Nakimuli A, Byamugisha J, Oei SG. Study protocol training for life: a stepped wedge cluster randomized trial about emergency obstetric simulation-based training in a low-income country. BMC Pregnancy Childbirth. 2020 Jul 28;20(1):429 | Study protocol                                  | Protocol           |
| Ayala NK, Schlichting LE, Kole MB, Clark MA, Vivier PM, Viner-Brown SI, Werner EF. Operative vaginal delivery and third grade educational outcomes.Am J Obstet Gynecol MFM. 2020 Nov;2(4):100221.                                                                                                                                                   | Not a training or QI initiative to increase AVB | Wrong Intervention |
| Chang, Xavier; Chedraui, Peter; Ross, Michael G.; Hidalgo, Luis; Penafiel, Jaime Vacuum assisted delivery in Ecuador for prolonged second stage of labor: maternal-neonatal outcome The journal of maternal-fetal & neonatal medicine. 2007 2007;20(5):381-4                                                                                        | Not a training or QI initiative                 | Wrong Intervention |
| Chen CC, Lee JF. Effectiveness of the doula program in Northern Taiwan. Tzu Chi Med J. 2020 Apr 1;32(4):373-379.                                                                                                                                                                                                                                    | Not a training or QI initiative to increase AVB | Wrong Intervention |
| Davison, Margaret Anne; Murray, Sarah; Whitaker, Lucy; Rendall, Lesley; Gammie, Nicky; Magowan, Brian. Comparison of instrumental vaginal births by assisted birth practitioner midwives and medical practitioners. British Journal of Midwifery 2014;22(10):700-705                                                                                | Not a training or QI initiative to increase AVB | Wrong Intervention |
| Ghi T, Rizzo G; EGEO Group. The use of a hybrid mannequin for the modern high-fidelity simulation in the labor ward: the Italian experience of the Ecografia Gestione Emergenze Ostetriche (EGEO) group. Am J Obstet Gynecol. 2020 Jan;222(1):41-47.                                                                                                | Not a training or QI initiative to increase AVB | Wrong Intervention |
| Hildebrand E, Nelson M, Blomberg M. Long-term effects of the nine-item list intervention on obstetric and neonatal outcomes in Robson group 1 - A time series study. Acta Obstet Gynecol Scand. 2021 Jan;100(1):154-161.                                                                                                                            | Not a training or QI initiative to increase AVB | Wrong Intervention |
| Hinkson L, Henrich W, Tutschek B. Intrapartum ultrasound during rotational forceps delivery: a novel tool for safety, quality control, and teaching. Am J Obstet Gynecol. 2021 Jan;224(1):93.e1-93.e7.                                                                                                                                              | Not a training or QI initiative to increase AVB | Wrong Intervention |

|                                                                                                                                                                                                                                                                                                                                                    |                                                                                              |                    |
|----------------------------------------------------------------------------------------------------------------------------------------------------------------------------------------------------------------------------------------------------------------------------------------------------------------------------------------------------|----------------------------------------------------------------------------------------------|--------------------|
| Romero S, Pettersson K, Yousaf K, Westgren M, Ajne G. Perinatal outcome after vacuum assisted delivery with digital feedback on traction force; a randomised controlled study. BMC Pregnancy Childbirth. 2021 Feb 26;21(1):165. doi: 10.1186/s12884-021-03604-z. PMID: 33637058; PMCID: PMC7913459.                                                | Not a training or QI initiative to increase AVB                                              | Wrong Intervention |
| Waller-Wise R, Lewis S, Williams B. A Quality Improvement Project Utilizing a Clinical Practice Guideline in Women During Second-Stage Labor. J Perinat Educ. 2020 Apr 1;29(2):72-82. doi: 10.1891/J-PE-D-19-00014. PMID: 32308356; PMCID: PMC7159796.                                                                                             | Not a training or QI initiative to increase AVB                                              | Wrong Intervention |
| Cheong, Y. C.; Abdullahi, H.; Lashen, H.; Fairlie, F. M. Can formal education and training improve the outcome of instrumental delivery? European Journal of Obstetrics and Gynecology and Reproductive Biology 2004;113(2):139-144                                                                                                                | Increase of AVB use was not one of the Objectives or cited as one of the Outcomes in Methods | Wrong Outcome      |
| Chikazawa, K.; Takagi, K.; Takahashi, H.; Akashi, K.; Nakamura, E.; Samejima, K.; Ushijima, J.; Horiuchi, I. Introduction of forceps delivery education for residents at a single perinatal institution. Hypertension Research in Pregnancy 2016;4(2):102-105                                                                                      | No data on AVB use before x after intervention                                               | Wrong Outcome      |
| Coste Mazeau, P; Boukeffa, N; Ticaud Boileau, N; Huet, S; Traverse, M; Eyraud, JL; Laguerre, A; Catalan, C; Riedl, C Evaluation of Suzor forceps training by studying obstetric anal sphincter injuries: a retrospective study. BMC Pregnancy Childbirth 20, 674 (2020)                                                                            | No data on AVB use before x after intervention                                               | Wrong Outcome      |
| Dolo O, Clack A, Gibson H, Lewis N, Southall DP. Training of midwives in advanced obstetrics in Liberia. Bull World Health Organ. 2016 May 1;94(5):383-7.                                                                                                                                                                                          | No data on AVB use before x after intervention                                               | Wrong Outcome      |
| Egami N, Muta R, Anami A, Koga H. Impact of clinical practice guidelines for vacuum-assisted delivery on maternal and neonatal outcomes in Japan: A single-center observational study. J Obstet Gynaecol Res. 2021 Jan;47(1):167-173                                                                                                               | No data on AVB use before x after intervention (assessed only success rates).                | Wrong Outcome      |
| van Tetering AAC, Segers MHM, Ntuyo P, Namagambe I, van der Hout-van der Jagt MB, Byamugisha JK, Oei SG. Evaluating the Instructional Design and Effect on Knowledge, Teamwork, and Skills of Technology-Enhanced Simulation-Based Training in Obstetrics in Uganda: Stepped-Wedge Cluster Randomized Trial. JMIR Med Educ. 2021 Feb 5;7(1):e17277 | Present only Kirpatrick 1 and 2 outcomes                                                     | Wrong outcome      |
